# Supplementary material for: Falling Apart and Coming Together: How Public Perceptions of Leadership Change in Response to Natural Disasters vs. Health Crises
Source: MDPI journal article supplement (doi:10.3390/su14020837), 2022-01-12
Supplement: s1 [file s1]

Archive with 1 entries (1 files):
- sustainability-1532889-SI.pdf
