# Supplementary material for: Falling Apart and Coming Together: How Public Perceptions of Leadership Change in Response to Natural Disasters vs. Health Crises
Source: MDPI journal article supplement (doi:10.3390/su14020837), 2022-01-12
Supplement: s1 [file s1 › sustainability-1532889-SI.pdf]

**Table S1.** Exploratory Factor Analysis (1 Factor Model)

| Indicator                                                 | Factor 1 |
|-----------------------------------------------------------|----------|
| To what extent do you think the Federal Government are... |          |
| showing leadership for the public good                    | 0.746*   |
| making the world a better place                           | 0.781*   |
| supporting the long-term welfare of society               | 0.789*   |
| focused on creating positive social outcomes              | 0.839*   |
| focused on creating positive economic outcomes            | 0.745*   |
| focused on creating positive environmental outcomes       | 0.792*   |
| transparent                                               | 0.826*   |
| demonstrating high ethical standards                      | 0.877*   |
| be accountable for their actions                          | 0.818*   |
| be responsive to society's needs                          | 0.848*   |
| responsive to the people it serves                        | 0.867*   |
| balancing the needs of different groups                   | 0.835*   |
| balancing long-term and short-term goals                  | 0.835*   |
| using resources efficiently                               | 0.836*   |
| treating people fairly                                    | 0.872*   |

Note. \*  $p < .05$ .

**Table S2.** Exploratory Factor Analysis (2 Factor Model).

| Indicator                                                 | Factor 1 | Factor 2 |
|-----------------------------------------------------------|----------|----------|
| To what extent do you think the Federal Government are... |          |          |
| making the world a better place                           | 0.950*   | -0.017   |
| showing leadership for the public good                    | 0.874*   | 0.008    |
| supporting the long-term welfare of society               | 0.826*   | 0.092*   |
| balancing the needs of different groups                   | -0.036   | 0.871*   |
| balancing long-term and short-term goals                  | -0.024   | 0.860*   |
| focused on creating positive social outcomes              | -0.018   | 0.859*   |
| treating people fairly                                    | 0.033    | 0.848*   |
| using resources efficiently                               | -0.001   | 0.841*   |
| demonstrating high ethical standards                      | 0.049    | 0.838*   |
| be responsive to society's needs                          | 0.017    | 0.838*   |
| focused on creating positive environmental outcomes       | -0.026   | 0.819*   |
| focused on creating positive economic outcomes            | -0.079   | 0.818*   |
| responsive to the people it serves                        | 0.07     | 0.810*   |
| transparent                                               | 0.04     | 0.797*   |
| be accountable for their actions                          | 0.079    | 0.753*   |

Note. \*  $p < .05$ . The correlation between the factors was .795.

**Table S3.** Exploratory Factor Analysis (3 Factor Model).

| Indicator                                                 | Factor 1 | Factor 2 | Factor 3 |
|-----------------------------------------------------------|----------|----------|----------|
| To what extent do you think the Federal Government are... |          |          |          |
| making the world a better place                           | 0.949*   | -0.021   | -0.003   |
| supporting the long-term welfare of society               | 0.899*   | 0.012    | 0.152*   |
| showing leadership for the public good                    | 0.882*   | -0.002   | -0.016   |
| demonstrating high ethical standards                      | 0.01     | 0.887*   | -0.142*  |
| transparent                                               | -0.028   | 0.883*   | -0.239*  |
| responsive to the people it serves                        | 0.031    | 0.856*   | -0.129*  |
| using resources efficiently                               | -0.013   | 0.855*   | -0.052   |
| treating people fairly                                    | 0.03     | 0.850*   | -0.011   |
| be accountable for their actions                          | 0.012    | 0.835*   | -0.219*  |
| balancing long-term and short-term goals                  | -0.002   | 0.833*   | 0.078    |
| be responsive to society's needs                          | 0.023    | 0.829*   | 0.027    |
| balancing the needs of different groups                   | -0.002   | 0.828*   | 0.159*   |
| focused on creating positive social outcomes              | 0.01     | 0.820*   | 0.173*   |
| focused on creating positive economic outcomes            | -0.058   | 0.790*   | 0.1      |
| focused on creating positive environmental outcomes       | -0.002   | 0.787*   | 0.127*   |

*Note.* \*  $p < .05$ . The correlations between the factors were .801 (Factors 1 and 2), -.021 (Factors 1 and 3) and .126 (Factors 2 and 3).

**Table S4** Exploratory Factor Analysis (4 Factor Model).

| Indicator                                                 | Factor 1 | Factor 2 | Factor 3 | Factor 4 |
|-----------------------------------------------------------|----------|----------|----------|----------|
| To what extent do you think the Federal Government are... |          |          |          |          |
| making the world a better place                           | 0.933*   | 0.001    | -0.036   | 0.018    |
| supporting the long-term welfare of society               | 0.894*   | 0.025    | 0.034    | -0.104   |
| showing leadership for the public good                    | 0.872*   | 0.005    | -0.002   | 0.066    |
| transparent                                               | -0.017   | 0.868*   | -0.080   | 0.181*   |
| responsive to the people it serves                        | 0.043    | 0.862*   | -0.107*  | 0.040    |
| demonstrating high ethical standards                      | 0.019    | 0.860*   | 0.017    | 0.150*   |
| using resources efficiently                               | 0.003    | 0.843*   | -0.025   | 0.004    |
| treating people fairly                                    | 0.047    | 0.832*   | 0.017    | -0.010   |
| balancing long-term and short-term goals                  | 0.017    | 0.819*   | 0.034    | -0.099*  |
| be responsive to society's needs                          | 0.039    | 0.812*   | 0.033    | -0.032   |
| be accountable for their actions                          | 0.012    | 0.810*   | 0.006    | 0.240*   |
| focused on creating positive economic outcomes            | -0.037   | 0.805*   | -0.063   | -0.220*  |
| balancing the needs of different groups                   | 0.017    | 0.793*   | 0.149    | -0.094   |
| focused on creating positive social outcomes              | 0.024    | 0.780*   | 0.194*   | -0.090   |
| focused on creating positive environmental outcomes       | -0.005   | 0.719*   | 0.353*   | 0.055    |

*Note.* \*  $p < .05$ . The correlations between the factors were .796 (Factors 1 and 2), .172 (Factors 1 and 3), .083 (Factors 1 and 4), .209 (Factors 2 and 3), -.006 (Factors 2 and 4), and -.164 (Factors 3 and 4).

**Table S5.** Means, Standard Deviations, Correlations Among Variables.

|                                                           | 1      | 2       | 3       | 4      | 5      | 6      | 7      | 8      | 9      | 10     | 11     | 12     | 13     | 14     | 15     | 16      | 17  |
|-----------------------------------------------------------|--------|---------|---------|--------|--------|--------|--------|--------|--------|--------|--------|--------|--------|--------|--------|---------|-----|
| General Items ( $\alpha = .93$ )                          |        |         |         |        |        |        |        |        |        |        |        |        |        |        |        |         |     |
| 1. ...showing leadership for the public good              | --     |         |         |        |        |        |        |        |        |        |        |        |        |        |        |         |     |
| 2. ...making the world a better place                     | .81*** | --      |         |        |        |        |        |        |        |        |        |        |        |        |        |         |     |
| 3. ...supporting the long-term welfare of society         | .80*** | .84***  | --      |        |        |        |        |        |        |        |        |        |        |        |        |         |     |
| Specific Items ( $\alpha = .97$ )                         |        |         |         |        |        |        |        |        |        |        |        |        |        |        |        |         |     |
| 4. ...focused on creating positive social outcomes        | .63*** | .67***  | .68***  | --     |        |        |        |        |        |        |        |        |        |        |        |         |     |
| 5. ...focused on creating positive economic outcomes      | .51*** | .53***  | .54***  | .65*** | --     |        |        |        |        |        |        |        |        |        |        |         |     |
| 6. ...focused on creating positive environmental outcomes | .60*** | .63***  | .63***  | .71*** | .56*** | --     |        |        |        |        |        |        |        |        |        |         |     |
| 7. ...transparent                                         | .64*** | .66***  | .65***  | .70*** | .58*** | .68*** | --     |        |        |        |        |        |        |        |        |         |     |
| 8. ...demonstrating high ethical standards                | .69*** | .70***  | .69***  | .73*** | .61*** | .71*** | .77*** | --     |        |        |        |        |        |        |        |         |     |
| 9. ...be accountable for their actions                    | .67*** | .68***  | .68***  | .71*** | .60*** | .69*** | .77*** | .78*** | --     |        |        |        |        |        |        |         |     |
| 10. ...be responsive to society's needs                   | .67*** | .68***  | .69***  | .74*** | .65*** | .69*** | .72*** | .75*** | .75*** | --     |        |        |        |        |        |         |     |
| 11. ...responsive to the people it serves                 | .69*** | .69***  | .69***  | .73*** | .62*** | .67*** | .75*** | .76*** | .76*** | .78*** | --     |        |        |        |        |         |     |
| 12. ...balancing the needs of different groups            | .62*** | .64***  | .67***  | .73*** | .60*** | .68*** | .69*** | .72*** | .68*** | .74*** | .73*** | --     |        |        |        |         |     |
| 13. ...balancing long-term and short-term goals           | .63*** | .66***  | .67***  | .72*** | .63*** | .70*** | .71*** | .74*** | .71*** | .74*** | .73*** | .71*** | --     |        |        |         |     |
| 14. ...using resources efficiently                        | .63*** | .66***  | .65***  | .72*** | .63*** | .68*** | .72*** | .75*** | .73*** | .72*** | .73*** | .69*** | .72*** | --     |        |         |     |
| 15. ...treating people fairly                             | .66*** | .67***  | .68***  | .73*** | .65*** | .68*** | .74*** | .76*** | .74*** | .76*** | .77*** | .72*** | .73*** | .73*** | --     |         |     |
| Time Periods (dummy variables)                            |        |         |         |        |        |        |        |        |        |        |        |        |        |        |        |         |     |
| 16. Bushfires (Q4 2019, Q1 2020)                          | -.07** | -.07*** | -.08*** | -.02   | -.01   | .01    | -.04   | -.02   | -.02   | -.04   | -.03   | -.03   | -.01   | -.01   | -.02   | --      |     |
| 17. COVID Response (Q2-Q3 2020)                           | .24*** | .20***  | .19***  | .15*** | .14*** | .09*** | .16*** | .16*** | .15*** | .19*** | .18*** | .15*** | .15*** | .13*** | .16*** | -.29*** | --  |
| Mean                                                      | 2.72   | 2.62    | 2.69    | 2.62   | 2.97   | 2.48   | 2.38   | 2.43   | 2.44   | 2.60   | 2.55   | 2.59   | 2.64   | 2.50   | 2.58   | .22     | .23 |
| SD                                                        | 1.20   | 1.18    | 1.19    | 1.13   | 1.17   | 1.17   | 1.23   | 1.22   | 1.26   | 1.16   | 1.18   | 1.13   | 1.16   | 1.16   | 1.18   | .41     | .42 |

Note. \*  $p < .05$ , \*\*  $p < .01$ , \*\*\*  $p < .001$ ; N = 2,049 (below diagonal).
